# Supplementary material for: Pond dyes are Culex mosquito oviposition attractants
Source: PeerJ. 2017 May 31;5:e3361. doi: 10.7717/peerj.3361 (PMC5455297; doi:10.7717/peerj.3361)
Supplement: Supplemental Information 1 [file peerj-05-3361-s001.xlsx]

## Sheet: oviposition in lab
No cover				Cover
Replicate	Dye	Tap		Replicate	Dye	Tap
1	12	1		1	10	2
2	9	4		2	8	0
3	11	3		3	8	3
4	12	3		4	9	2
5	12	1		5	11	3
Total	56	12		Total	46	10
Mean	11.2	2.4		Mean	9.2	2
SD	1.30384	1.34164		sd	1.30384	1.22474
SE	0.583095	0.6		se	0.583095	0.547723
	Day 1				Day 2				Day3				Day4
Replicate	Dye	Tap		Replicate	Dye	Tap		Replicate	Dye	Tap		Replicate	Dye	Tap
1	9	1		1	3	0		1	0	0		1	0	0
2	4	1		2	1	2		2	3	1		2	1	0
3	4	1		3	5	0		3	1	1		3	1	1
4	8	2		4	1	1		4	3	0		4	0	0
5	4	0		5	4	1		5	2	0		5	2	0

## Sheet: oviposition in tent
	Dye	Tap
#eggs	37	7
	15	1
	10	11
	30	1
	0	0
	5	4
	10	14
	5	0
	26	1
	1	0
	0	1
	3	0
	40	2
	12	0
	5	0
	7	13
	5	0
	2	0
Total	213	55

## Sheet: emerg-summ
		Dye replicates										Control replicates
		1	2	3	4	5	6	7	8	9		1	2	3	4	5	6	7	8	9
	2017-08-28	2	0	3	7	6	1	11	5	12		0	18	35	8	12	31	11	37	4
	2017-08-29	1	0	1	1	5	6	12	5	13		0	2	4	5	5	10	5	43	5
	2017-08-30	1	1	3	1	1	2	6	1	4		0	4	5	0	2	6	0	5	3
	2017-08-31	0	3	11	0	0	10	5	6	9		0	3	11	5	4	4	4	0	10
	2017-09-01	7	0	14	0	0	10	11	11	10		0	11	18	5	8	4	10	2	9
	2017-09-02	7	3	4	3	10	16	3	9	0		12	26	1	18	22	8	6	0	9
	2017-09-03	4	4	0	6	5	1	2	1	5		5	9	0	14	10	0	1	0	0
	2017-09-04	3	3	0	4	9	2	0	0	1		9	5	0	12	4	0	4	0	4
	2017-09-05	2	2	0	5	6	1	0	0	0		1	2	0	6	1	0	3	0	1
	2017-09-06	1	1	0	4	3	0	0	0	0		3	0	0	7	0	0	0	0	0
	2017-09-07	0	0	0	3	4	0	0	0	0		1	0	0	1	1	0	0	0	0

## Sheet: emerg-autu
Dates	Dye replicates autumn									Total	Control replicates autumn									Total
	1	2	3	4	5	6	7	8	9		1	2	3	4	5	6	7	8	9
2015-10-10	0	0	1	0	0	0	0	0	0	1	5	0	3	0	0	0	1	0	0	9
2015-10-12	2	0	13	0	0	0	1	1	0	17	6	1	7	0	0	0	1	0	0	15
2015-10-13	1	1	2	0	0	0	0	0	0	4	3	0	8	0	0	0	0	0	0	11
2015-10-14	4	4	2	0	0	0	0	0	0	10	3	2	4	0	0	0	0	0	0	9
2015-10-15	0	2	0	0	0	0	5	0	0	7	1	0	1	0	1	0	0	0	0	3
2015-10-17	8	15	1	0	0	0	1	5	1	31	4	2	5	0	0	0	2	0	3	16
2015-10-19	2	9	1	0	0	0	3	5	2	22	4	5	10	2	0	2	5	0	3	31
2015-10-20	4	5	0	0	0	1	2	0	3	15	1	0	5	5	1	0	4	0	3	19
2015-10-21	3	4	0	0	0	0	6	5	4	22	3	0	4	11	0	1	7	2	2	30
2015-10-22	4	2	0	0	0	0	5	5	1	17	2	1	6	22	10	4	5	2	6	58
2015-10-23	1	2	0	1	3	3	4	2	2	18	3	2	2	4	4	1	5	3	3	27
2015-10-24	1	3	0	0	0	2	2	2	2	12	1	4	0	8	3	3	1	5	4	29
2015-10-26	0	1	0	2	1	9	4	3	6	26	2	4	2	4	16	1	11	9	6	55
2015-10-27	0	0	0	1	1	2	4	4	1	13	0	2	0	2	1	2	5	3	2	17
2015-10-28	1	1	0	0	0	8	8	6	1	25	1	7	0	3	11	8	9	10	9	58
2015-10-30	0	1	0	5	4	14	6	6	4	40	1	9	0	3	16	5	5	14	9	62
2015-10-31	0	0	0	1	3	9	1	2	0	16	0	2	0	3	6	1	7	2	2	23
2015-11-02	1	0	0	3	1	5	0	1	7	18	0	1	0	1	5	3	2	5	3	20
2015-11-03	0	0	0	0	2	2	1	3	0	8	0	2	0	1	2	4	1	1	2	13
2015-11-04	0	0	0	4	3	3	0	3	2	15	0	3	0	0	1	7	1	0	0	12
2015-11-05	0	0	0	4	1	4	0	1	0	10	0	0	0	1	0	6	2	0	0	9
2015-11-07	0	0	0	2	4	0	0	0	3	9	0	4	0	0	0	10	0	0	0	14
2015-11-09	0	1	0	1	0	1	0	0	2	5	0	0	0	0	0	4	0	0	0	4
2015-11-10	0	0	0	1	0	2	0	0	1	4	0	2	0	0	0	1	0	0	0	3
2015-11-13	0	0	0	0	0	0	0	0	0	0	0	0	0	0	0	2	0	0	0	2
2015-11-16	0	0	0	0	0	0	0	0	0	0	0	0	0	0	0	0	0	0	0	0
										365										549
