# Supplementary material for: Pond dyes are Culex mosquito oviposition attractants
Source: PeerJ. 2017 May 31;5:e3361. doi: 10.7717/peerj.3361 (PMC5455297; doi:10.7717/peerj.3361)
Supplement: Supplemental Information 2 [file peerj-05-3361-s002.xlsx]

## Sheet: Repli-1-1
	date	treatment 1		treatment 2
		tap water + dyo		tap water
		N. larvae	N. Pupae	N. larvae	N. Pupae
1	2014-06-16	240	0	160	0
2	2014-06-23	162	0	126	0
3	2014-07-02	2	1	27	0
4	2014-07-07	1	0	44	0
5	2017-07-14	8	0	31	0
6	2014-07-21	0	0	3	0
7	2014-07-28	1	0	2	0
8	2014-08-04	25	0	1	0
9	2014-08-11	13	0	3	0
10	2014-08-18	3	0	189	0
11	2014-08-26	0	0	16	0
12	2014-09-01	55	0	3	0
13	2014-09-08	89	0	12	0
14	2014-09-15	21	0	0	0
15	2014-09-22	5	0	3	0
16	2014-09-29	3	0	4	0
17	2014-10-07	0	0	1	0
18	2014-10-14	0	0	0	0
19	2014-10-21	0	0	0	0
20	2014-10-28	0	0	0	0
21	2014-11-04	0	0	0	0
22	2014-11-12	0	0	0	0
23	2014-11-18	0	0	0	0
24	2014-11-25	0	0	0	0
25	2014-12-02	0	0	0	0
26	2014-12-09	0	0	0	0

## Sheet: Repli-2-2
		treatment 1		treatment 2
	date	tap water + dyo		tap water
		N. larvae	N. Pupae	N. larvae	N. Pupae
1	2014-06-16	120	0	150	0
2	2014-06-23	159	0	250	0
3	2014-07-02	105	1	152	0
4	2014-07-07	22	0	132	0
5	2017-07-14	28	0	60	0
6	2014-07-21	4	0	32	1
7	2014-07-28	3	0	5	0
8	2014-08-04	0	0	5	0
9	2014-08-11	3	0	9	0
10	2014-08-18	1	0	1	0
11	2014-08-26	1	0	3	1
12	2014-09-01	11	0	6	0
13	2014-09-08	4	0	1	0
14	2014-09-15	14	0	0	0
15	2014-09-22	8	4	1	0
16	2014-09-29	11	1	5	0
17	2014-10-07	11	0	5	0
18	2014-10-14	15	0	4	0
19	2014-10-21	4	2	13	2
20	2014-10-28	3	0	3	2
21	2014-11-04	0	1	0	0
22	2014-11-12	1	1	0	0
23	2014-11-18	0	0	2	0
24	2014-11-25	0	0	0	1
25	2014-12-02	0	0	0	0
26	2014-12-09	0	0	0	0

## Sheet: Repli-3-3
		treatment 1		treatment 2
	date	tap water + dyo		tap water
		N. larvae	N. Pupae	N. larvae	N. Pupae
1	2014-06-16	80	0	180	0
2	2014-06-23	73	0	32	0
3	2014-07-02	22	0	22	0
4	2014-07-07	7	0	5	11
5	2014-07-14	7	0	2	0
6	2014-07-21	5	0	0	0
7	2014-07-28	4	0	0	0
8	2014-08-04	1	0	0	0
9	2014-08-11	0	0	8	0
10	2014-08-18	0	0	17	0
11	2014-08-26	0	0	14	0
12	2014-09-01	0	0	16	0
13	2014-09-08	0	0	1	0
14	2014-09-15	0	0	4	0
15	2014-09-22	0	0	0	1
16	2014-09-29	0	0	1	0
17	2014-10-07	0	0	0	0
18	2014-10-14	0	0	0	0
19	2014-10-21	0	0	0	0
20	2014-10-28	0	0	0	0
21	2014-11-04	0	0	0	0
22	2014-11-12	0	0	0	0
23	2014-11-18	0	0	0	0
24	2014-11-25	0	0	0	0
25	2014-12-02	0	0	0	0
26	2014-12-09	0	0	0	0

## Sheet: Repli-4-4
		treatment 1		treatment 2
	date	tap water + dyo		tap water
		N. larvae	N. Pupae	N. larvae	N. Pupae
1	2014-06-16	150	0	140	0
2	2014-06-23	62	0	68	0
3	2014-07-02	16	0	12	0
4	2014-07-07	2	0	5	0
5	2014-07-14	0	0	4	0
6	2014-07-21	0	0	0	0
7	2014-07-28	0	0	0	0
8	2014-08-04	21	0	37	0
9	2014-08-11	0	0	2	0
10	2014-08-18	0	0	2	0
11	2014-08-26	0	0	0	0
12	2014-09-01	0	0	0	0
13	2014-09-08	0	0	0	0
14	2014-09-15	0	0	0	0
15	2014-09-22	16	0	0	0
16	2014-09-29	7	0	2	0
17	2014-10-07	14	0	0	0
18	2014-10-14	0	0	0	0
19	2014-10-21	0	0	0	0
20	2014-10-28	0	0	0	0
21	2014-11-04	0	0	0	0
22	2014-11-12	0	0	0	0
23	2014-11-18	0	0	0	0
24	2014-11-25	0	0	0	0
25	2014-12-02	0	0	0	0
26	2014-12-09	0	0	0	0

## Sheet: Repli-5-5
		treatment 1		treatment 2
	date	tap water + dyo		tap water
		N. larvae	N. Pupae	N. larvae	N. Pupae
1	2014-05-01	0	0	0	0
2	2014-05-06	0	0	0	0
3	2014-05-12	0	0	0	0
4	2014-05-19	0	0	0	0
5	2014-05-27	0	0	0	0
6	2014-06-02	0	0	0	0
7	2014-06-09	0	0	1	0
8	2014-06-16	167	0	171	0
9	2014-06-23	32	0	73	0
10	2014-07-02	32	0	29	0
11	2017-07-07	17	0	24	2
12	2014-07-14	0	0	4	0
13	2014-07-21	57	3	44	1
14	2014-07-28	90	0	12	0
15	2014-08-04	73	0	71	0
16	2014-08-11	172	1	24	1
17	2014-08-18	65	2	10	0
18	2014-08-26	51	3	10	1
19	2014-09-01	19	2	6	0
20	2014-09-08	21	0	3	0
21	2014-09-15	32	0	2	0
22	2014-09-22	13	0	4	0
23	2014-09-29	7	1	5	0
24	2014-10-07	2	2	4	1
25	2014-10-14	8	0	0	0
26	2014-10-21	6	0	2	0
27	2014-10-28	1	0	0	0
28	2014-11-04	2	0	1	1
29	2014-11-12	1	0	0	0
30	2014-11-18	0	0	2	0
31	2014-11-25	0	0	0	0
32	2014-12-02	0	0	0	0
33	2014-12-09	0	0	0	0

## Sheet: Repli-6-6
		treatment 1		treatment 2
	date	tap water + dyo		tap water
		N. larvae	N. Pupae	N. larvae	N. Pupae
1	2014-06-16	87	0	113	0
2	2010-06-23	118	0	106	0
3	2014-07-02	43	0	55	0
4	2014-07-07	18	0	38	0
5	2014-07-14	14	0	11	0
6	2014-07-21	5	0	23	0
7	2014-07-28	0	0	46	0
8	2014-08-04	42	0	112	0
9	2014-08-11	1	0	51	0
10	2014-08-18	11	0	34	0
11	2014-08-26	4	0	20	0
12	2014-09-01	14	0	16	0
13	2014-09-08	20	0	12	1
14	2014-09-15	5	0	26	1
15	2014-09-22	8	1	10	1
16	2014-09-29	0	0	1	0
17	2014-10-07	6	0	1	0
18	2014-10-14	2	0	1	0
19	2014-10-21	3	0	0	0
20	2014-10-28	1	1	1	0
21	2014-11-04	0	1	0	0
22	2014-11-12	0	0	0	0
23	2014-11-18	0	0	0	0
24	2014-11-25	0	0	0	0
25	2014-12-02	0	0	0	0
26	2014-12-09	0	0	0	0

## Sheet: Repli-7-7
	date	treatment 1		treatment 2
		tap water + dyo		tap water
		N. larvae	N. Pupae	N. larvae	N. Pupae
1	2014-06-16	88	0	151	0
2	2014-06-23	40	0	55	0
3	2014-06-30	8	0	23	0
4	2014-07-07	2	0	3	0
5	2014-07-14	0	0	2	0
6	2014-07-21	0	0	0	0
7	2014-07-28	0	0	0	0
8	2014-08-04	0	0	1	0
9	2014-08-11	0	0	0	0
10	2014-08-18	0	0	0	0
11	2014-08-26	0	0	0	0
12	2014-09-01	0	0	0	0
13	2014-09-08	0	0	0	0
14	2014-09-15	0	0	0	0
15	2014-09-22	0	0	0	0
16	2014-09-29	0	0	0	0
17	2014-10-07	0	0	0	0
18	2014-10-14	0	0	0	0
19	2014-10-21	0	0	0	0
20	2014-10-28	0	0	0	0
21	2014-11-04	0	0	0	0
22	2014-11-12	0	0	0	0
23	2014-11-18	0	0	0	0
24	2014-11-25	0	0	0	0
25	2014-12-02	0	0	0	0
26	2014-12-09	0	0	0	0

## Sheet: Repli-8-8
			treatment 1		treatment 2
		date	tap water + dyo		tap water
			N. larvae	N. Pupae	N. larvae	N. Pupae
	1	2014-06-16	34	0	188	0
	2	2014-06-23	15	0	63	0
	3	2014-07-02	3	0	0	0
	4	2014-07-07	0	0	25	1
	5	2014-07-14	0	1	8	0
	6	2014-07-21	0	0	4	0
	7	2014-07-28	0	0	2	1
	8	2014-08-04	0	0	1	2
	9	2014-08-11	0	0	0	0
	10	2014-08-18	0	0	0	0
	11	2014-08-26	0	0	0	0
	12	2014-09-01	0	0	0	0
	13	2014-09-08	0	0	0	0
	14	2014-09-15	0	0	1	0
	15	2014-09-22	0	0	0	0
	16	2014-09-29	0	0	0	0
	17	2014-10-07	0	0	0	0
	18	2014-10-14	0	0	0	0
	19	2014-10-21	0	0	0	0
	20	2014-10-28	0	0	0	0
	21	2014-11-04	0	0	0	0
	22	2014-11-12	0	0	0	0
	23	2014-11-18	0	0	0	0
	24	2014-11-25	0	0	0	0
	25	2014-12-02	0	0	0	0
	26	2014-12-09	0	0	0	0
