# Supplementary material for: Pond dyes are Culex mosquito oviposition attractants
Source: PeerJ. 2017 May 31;5:e3361. doi: 10.7717/peerj.3361 (PMC5455297; doi:10.7717/peerj.3361)
Supplement: Supplemental Information 3 [file peerj-05-3361-s003.xlsx]

## Sheet: Repli-8-2
		treatment 1		treatment 2
	date	tap water + dyo		tap water
		N. larvae	N. Pupae	N. larvae	N. Pupae
1	2014-06-16	5	0	44	0
2	2014-06-23	48	0	66	0
3	2014-06-30	46	0	103	0
4	2014-07-07	53	0	87	0
5	2014-07-14	14	11	36	0
6	2014-07-21	6	1	41	1
7	2014-07-28	66	1	12	0
8	2014-08-04	20	0	13	0
9	2014-08-11	53	4	42	0
10	2014-08-18	62	0	37	0
11	2014-08-26	61	0	40	0
12	2014-09-01	25	0	49	0
13	2014-09-08	46	0	24	0
14	2014-09-15	42	1	18	1
15	2014-09-22	22	2	26	1
16	2014-09-29	34	0	25	2
17	2014-10-07	17	0	17	1
18	2014-10-14	38	1	24	0
19	2014-10-21	10	0	21	2
20	2014-10-28	5	3	4	3
21	2014-11-04	4	4	0	0
22	2014-11-12	0	2	0	0
23	2014-11-18	0	1	0	0
24	2014-11-25	0	0	0	0
25	2014-12-02	0	0	0	0
26	2014-12-09	0	0	0	0

## Sheet: Repli-9-3
		treatment 1		treatment 2
	date	tap water + dyo		tap water
		N. larvae	N. Pupae	N. larvae	N. Pupae
1	2014-06-16	14	0	28	0
2	2014-06-23	23	0	48	0
3	2014-06-30	45	0	61	0
4	2014-07-07	27	0	15	0
5	2014-07-14	7	0	8	0
6	2014-07-21	7	0	1	0
7	2014-07-28	4	0	24	0
8	2014-08-04	2	0	45	0
9	2014-08-11	19	0	31	0
10	2014-08-18	5	0	19	0
11	2014-08-26	6	0	16	0
12	2014-09-01	1	0	17	0
13	2014-09-08	1	0	13	0
14	2014-09-15	0	2	2	0
15	2014-09-22	0	0	5	0
16	2014-09-29	0	0	2	0
17	2014-10-07	0	0	0	0
18	2014-10-14	0	0	0	0
19	2014-10-21	0	0	0	0
20	2014-10-27	0	0	0	0
21	2014-11-04	0	0	0	0
22	2014-11-12	0	0	0	0
23	2014-11-18	0	0	0	0
24	2014-11-25	0	0	0	0
25	2014-12-02	0	0	0	0
26	2014-12-09	0	0	0	0

## Sheet: Repli-10-4
			treatment 1		treatment 2
		date	tap water + dyo		tap water
			N. larvae	N. Pupae	N. larvae	N. Pupae
	1	2014-06-16	28	0	12	0
	2	2014-06-23	30	0	23	0
	3	2014-06-30	35	0	22	1
	4	2014-07-07	35	0	14	0
	5	2014-07-14	40	0	12	0
	6	2014-07-21	5	1	3	0
	7	2014-07-28	11	0	4	0
	8	2014-08-04	9	0	12	0
	9	2014-08-11	8	0	4	0
	10	2014-08-18	6	0	11	0
	11	2014-08-26	5	0	10	0
	12	2014-09-01	6	0	2	0
	13	2014-09-08	12	2	1	0
	14	2014-09-15	21	0	4	2
	15	2004-09-22	15	2	7	0
	16	2014-09-29	29	0	16	0
	17	2014-10-07	2	0	15	1
	18	2014-10-14	1	0	20	0
	19	2014-10-21	0	0	11	1
	20	2014-10-28	0	0	2	4
	21	2014-11-04	26	0	1	1
	22	2014-11-12	19	0	2	0
	23	2014-11-18	17	0	4	0
	24	2012-11-25	3	0	2	0
	25	2014-12-02	14	0	1	0
	26	2014-12-09	5	0	2	0

## Sheet: Repli-11-5
		treatment 1		treatment 2
	date	tap water + dyo		tap water
		N. larvae	N. Pupae	N. larvae	N. Pupae
1	2014-06-16	27	0	51	0
2	2014-06-23	114	0	41	0
3	2014-06-30	39	0	70	0
4	2014-07-07	45	0	20	0
5	2014-07-14	32	0	21	0
6	2014-07-21	3	1	19	0
7	2014-07-28	4	0	3	0
8	2014-08-04	5	1	2	0
9	2014-04-11	3	0	5	0
10	2014-08-18	30	1	2	0
11	2014-08-26	22	0	13	0
12	2014-09-01	55	6	13	2
13	2014-09-08	144	2	5	0
14	2014-09-15	108	8	5	2
15	2014-09-22	39	3	3	0
16	2014-09-29	46	5	5	0
17	2014-10-07	31	1	10	0
18	2014-10-14	11	0	8	1
19	2014-10-21	3	0	2	0
20	2014-10-28	8	0	3	5
21	2014-11-04	0	1	2	1
22	2014-11-12	0	0	4	0
23	2014-11-18	0	0	1	0
24	2014-11-25	0	0	5	0
25	2014-12-02	0	0	5	0
26	2014-12-09	0	0	11	0

## Sheet: Repli12-6
	date	treatment 1		treatment 2
		tap water + dyo		tap water
		N. larvae	N. Pupae	N. larvae	N. Pupae
1	2014-06-16	65	0	21	0
2	2014-06-23	88	0	72	0
3	2014-06-30	128	0	139	0
4	2014-07-07	92	0	84	1
5	2014-07-14	33	1	15	0
6	2014-07-21	2	0	9	1
7	2014-07-28	5	0	9	0
8	2014-08-04	13	0	5	1
9	2014-08-11	7	0	2	0
10	2014-08-18	17	0	0	0
11	2014-08-26	2	0	0	0
12	2014-09-01	2	0	0	0
13	2014-09-08	4	0	0	0
14	2014-09-15	35	0	0	0
15	2014-09-22	16	0	0	0
16	2014-09-29	28	0	0	0
17	2014-10-07	0	0	0	0
18	2014-10-14	19	0	0	0
19	2014-10-21	8	1	0	0
20	2014-10-28	4	2	0	0
21	2014-11-04	0	1	0	0
22	2014-11-12	0	0	7	0
23	2014-11-18	0	0	2	0
24	2014-11-25	0	0	1	0
25	2014-12-02	0	0	2	0
26	2014-12-09	0	0	1	0

## Sheet: Repli-13-7
	date	treatment 1		treatment 2
		tap water		tap water + dyo
		N. larvae	N. Pupae	N. larvae	N. Pupae
1	2014-06-16	112	0	67	0
2	2014-06-23	148	0	52	0
3	2014-06-30	77	0	115	1
4	2014-07-07	22	0	51	0
5	2014-07-14	10	0	14	0
6	2014-07-21	2	0	4	0
7	2014-07-28	4	1	2	0
8	2014-08-04	8	0	1	0
9	2014-08-11	9	0	1	0
10	2014-08-18	16	0	1	0
11	2014-08-26	3	0	0	0
12	2014-09-01	1	0	0	0
13	2014-09-08	0	0	0	0
14	2014-09-15	0	0	0	0
15	2014-09-22	0	0	0	0
16	2014-09-23	0	0	0	0
17	2014-10-07	0	0	0	0
18	2014-10-14	0	0	0	0
19	2014-10-21	0	0	0	0
20	2014-10-27	0	0	0	0
21	2014-11-04	0	0	0	0
22	2014-11-12	0	0	0	0
23	2014-11-18	0	0	0	0
24	2014-11-25	0	0	0	0
25	2014-12-02	0	0	0	0
26	2014-12-09	0	0	0	0

## Sheet: Repli-16-8
	date	treatment 1		treatment 2
		tap water		tap water + dyo
		N. larvae	N. Pupae	N. larvae	N. Pupae
1	2014-06-16	15	0	27	0
2	2014-06-23	102	0	98	0
3	2014-06-30	147	0	74	0
4	2014-07-07	51	0	113	0
5	2014-07-14	34	0	33	0
6	2014-07-21	23	1	6	0
7	2014-07-28	6	0	8	0
8	2014-08-04	19	0	9	0
9	2014-08-11	5	0	11	0
10	2014-08-18	3	0	12	0
11	2014-08-26	15	0	5	0
12	2014-09-01	18	0	4	0
13	2014-09-08	10	1	11	9
14	2014-09-15	24	0	8	0
15	2014-09-22	21	1	4	0
16	2014-09-29	10	0	6	1
17	2014-10-07	15	0	1	0
18	2014-10-14	12	1	1	1
19	2014-10-21	1	4	0	0
20	2014-10-28	0	0	0	0
21	2014-11-04	0	0	0	0
22	2014-11-12	0	0	4	0
23	2014-11-18	0	0	0	0
24	2014-11-25	0	0	0	0
25	2014-12-02	5	0	10	3
26	2014-12-09	2	0	11	2
